# Supplementary material
Source: Springer Nature journal article supplement (https://www.springermedizin.de/resource/supplementary/13075_2012_3592_MOESM1_ESM.pdf/9694882)

**BASDAI 20**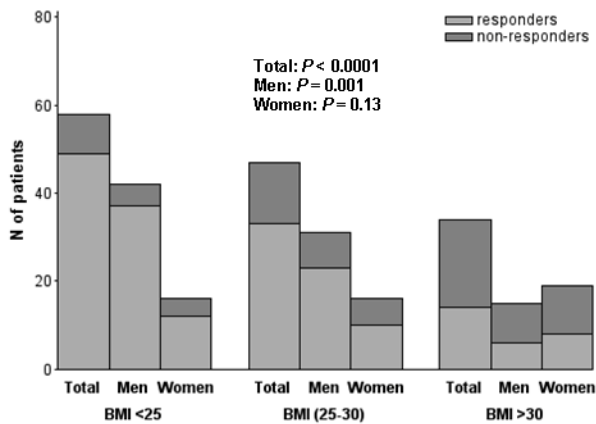**BASDAI 50**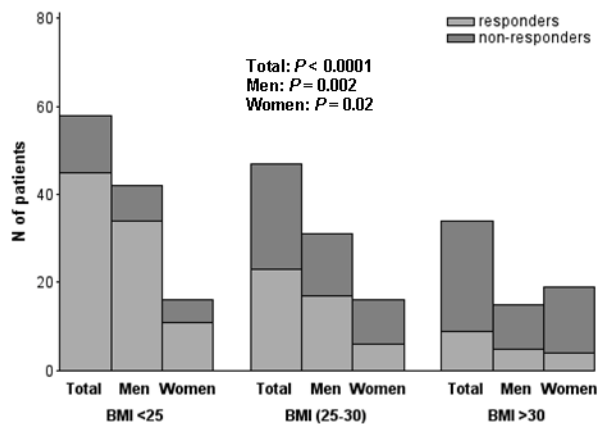**BASDAI 70**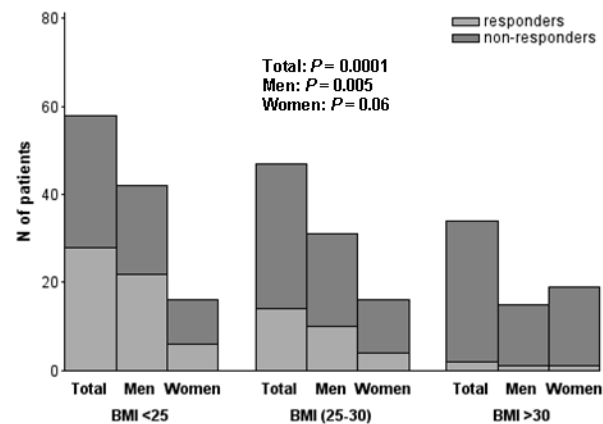**VAS 50**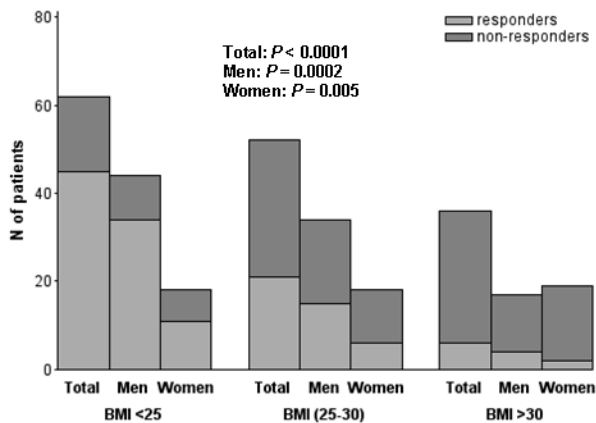**CRP 50**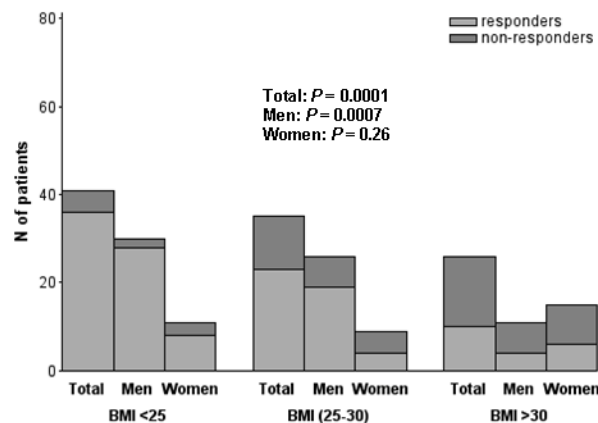**NSAID 50**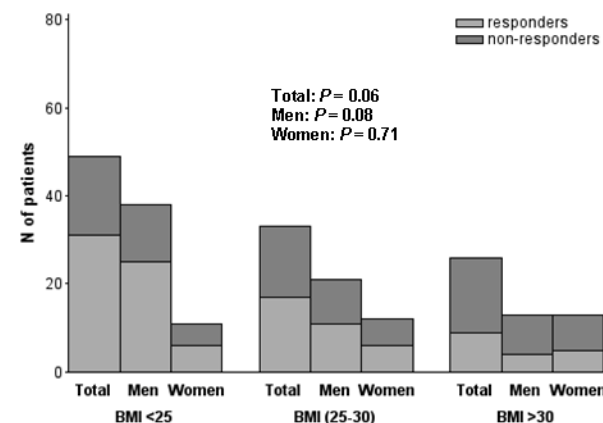

Supplement: MOESM1 [file 9694882]
